# Supplementary material for: Artificial Intelligence-Assisted Chest X-ray for the Diagnosis of COVID-19: A Systematic Review and Meta-Analysis
Source: MDPI journal article supplement (doi:10.3390/diagnostics13040584), 2023-02-05
Supplement: s1 [file s1]

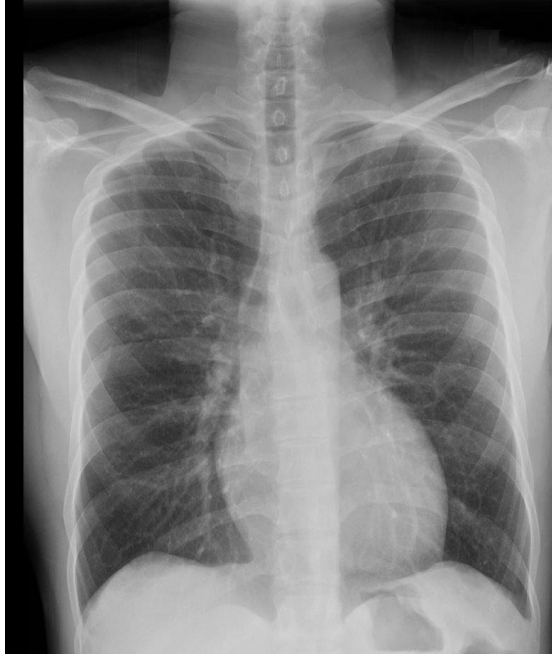

Normal

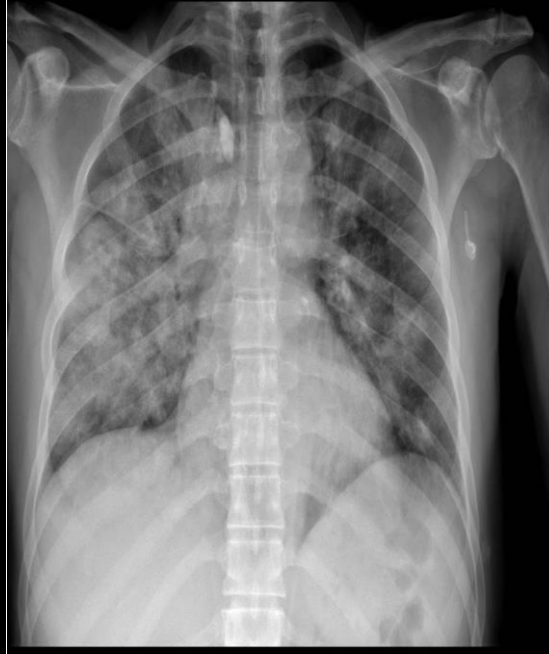

COVID-19

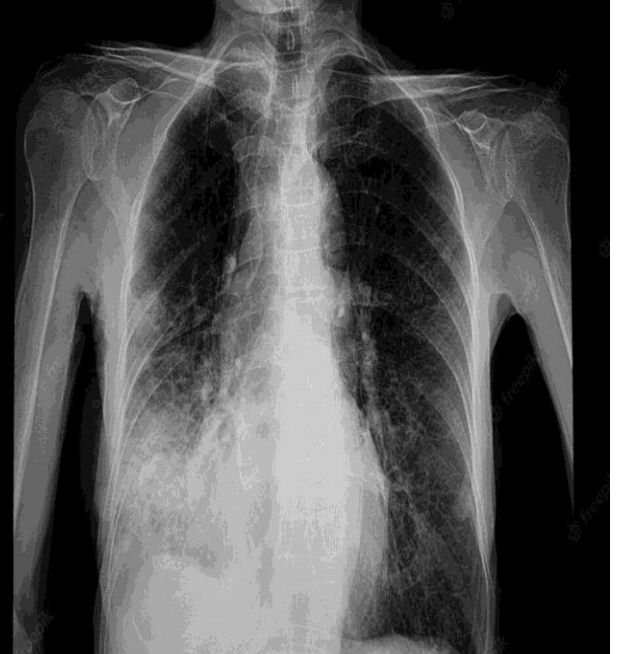

Pneumonia (right lower lung)

Source: <https://www.kaggle.com/datasets/alifrahman/covid19-chest-xray-image-dataset>;  
<https://lungs.thecommonvein.net/chest-x-ray-normal-cxr/>;  
[https://www.freepik.com/premium-photo/pneumonia-right-lower-lung\\_5064784.htm](https://www.freepik.com/premium-photo/pneumonia-right-lower-lung_5064784.htm)
